# Supplementary material for: Regulation of the bi-color fluorescence changes of AIE supramolecular self-assembly gels by interaction with Al3+ and energy transfer
Source: Royal Society of Chemistry journal article supplement (doi:10.1039/d1ma00709b), 2021-01-01
Supplement: d1ma00709b1.pdf [file d1ma00709b1.pdf]

## SUPPORTING INFORMATION

### Regulation of bi-color fluorescence changes of AIE supramolecular self-assembly gels by the interaction with Al<sup>3+</sup> and energy transfer

Xinxian Ma<sup>\*a</sup>, Jinlong Yue<sup>#a</sup>, Bo Qiao<sup>a</sup>, Lili Zhou<sup>a</sup>, Yang Gao<sup>a</sup>, Yipei Wang<sup>a</sup>, Yingshan Lai<sup>a</sup>, Yutao Geng<sup>a</sup>, Enke Feng<sup>a</sup>, Minghua Liu<sup>\*b</sup>

*College of Chemistry and Chemical Engineering, Ningxia Normal University, Guyuan 756000, People's Republic of China. Fax: 86 954 2079637; Tel: 86 954 2079637; E-mail: maxinxian@163.com*

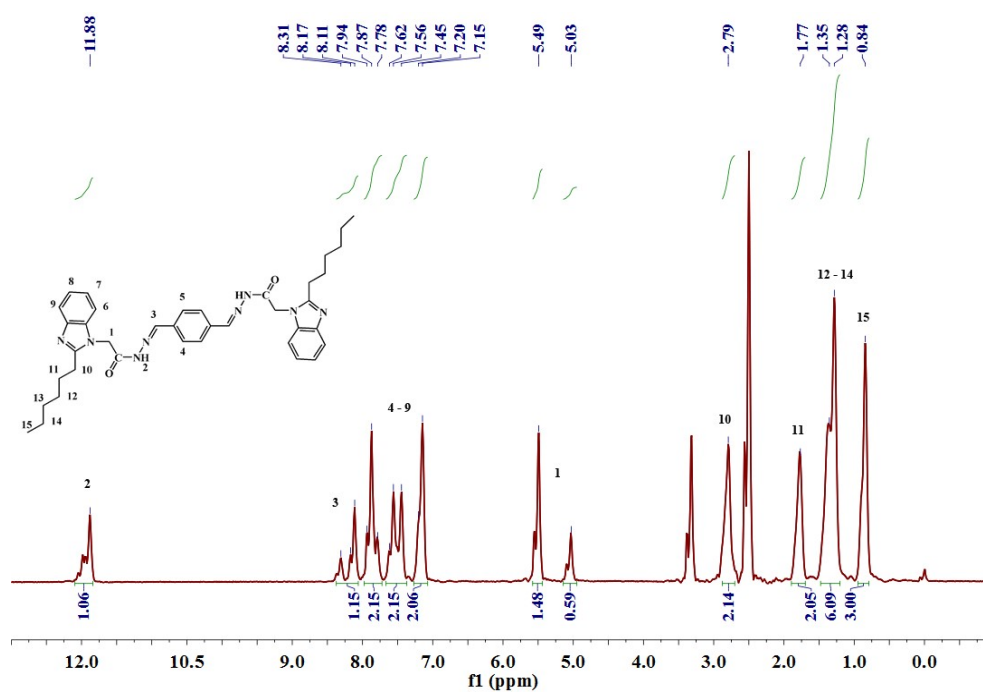

**Fig. S1.**  $^1\text{H}$  NMR spectrum of **BD** in  $\text{DMSO}-d_6$

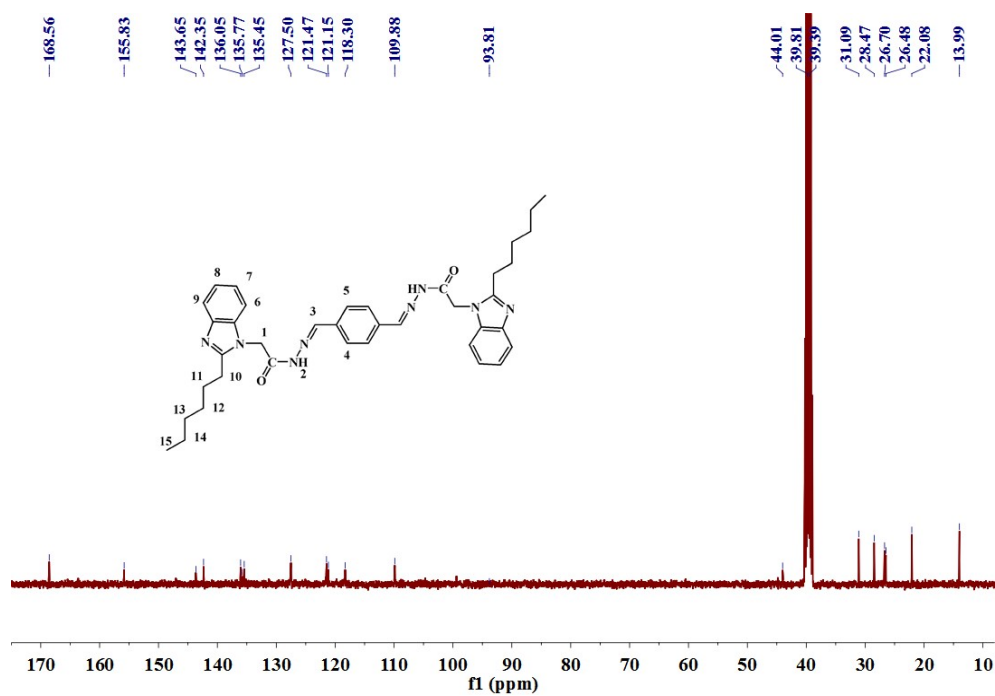

**Fig. S2.**  $^{13}\text{C}$  NMR spectrum of **BD** in  $\text{DMSO-}d_6$

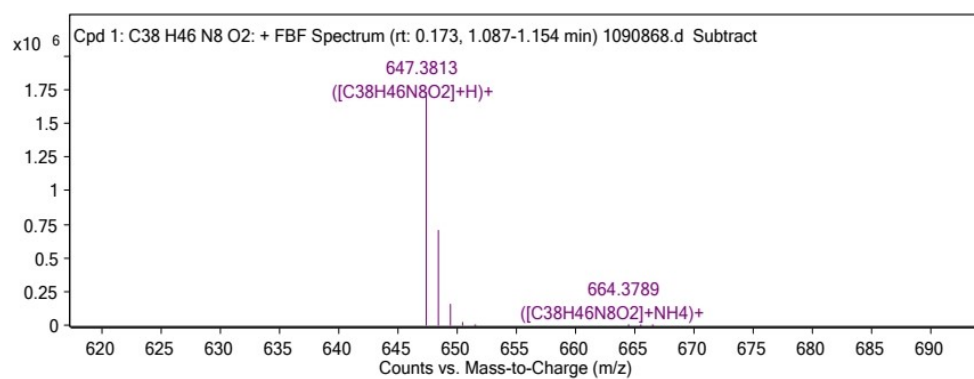

**Fig. S3.** ESI-MS spectrum of **BD**

**Table S1** Gelation properties of the supramolecular gel **BDG**

| Entry | Solvent                         | State <sup>a</sup> | CGC <sup>b</sup> (%) | T <sub>gel</sub> <sup>c</sup> (°C, wt %) |
|-------|---------------------------------|--------------------|----------------------|------------------------------------------|
| 1     | water                           | P                  | \                    | \                                        |
| 2     | cyclohexane                     | P                  | \                    | \                                        |
| 3     | petroleum ether                 | P                  | \                    | \                                        |
| 4     | THF                             | P                  | \                    | \                                        |
| 5     | CHCl <sub>3</sub>               | P                  | \                    | \                                        |
| 6     | CH <sub>2</sub> Cl <sub>2</sub> | P                  | \                    | \                                        |
| 7     | acetone                         | P                  | \                    | \                                        |
| 8     | DMF                             | G                  | 2.5                  | 74(2.5%)                                 |
| 9     | DMF-H <sub>2</sub> O            | G                  | 0.5                  | 95(0.5%)                                 |
| 10    | DMSO                            | G                  | 2                    | 82(2%)                                   |
| 11    | DMSO-H <sub>2</sub> O           | G                  | 0.5                  | 102(0.5%)                                |
| 12    | methanol                        | P                  | \                    | \                                        |
| 13    | ethanol                         | S                  | \                    | \                                        |
| 14    | ethanol-H <sub>2</sub> O        | P                  | \                    | \                                        |
| 15    | ethanediol                      | P                  | \                    | \                                        |
| 16    | isopropanol                     | P                  | \                    | \                                        |
| 17    | n-butyl alcohol                 | P                  | \                    | \                                        |
| 18    | n-amyl alcohol                  | P                  | \                    | \                                        |
| 19    | isopentanol                     | P                  | \                    | \                                        |
| 20    | n-hexanol                       | P                  | \                    | \                                        |
| 21    | ethyl acetate                   | P                  | \                    | \                                        |
| 22    | acetonitrile                    | P                  | \                    | \                                        |
| 23    | CCl <sub>4</sub>                | P                  | \                    | \                                        |

<sup>a</sup> G, P and S denote gelation, precipitation and solution, respectively

<sup>b</sup> The critical gelation concentration (wt %, 10 mg/mL = 1.0% )

<sup>c</sup> The gelation temperature (°C)

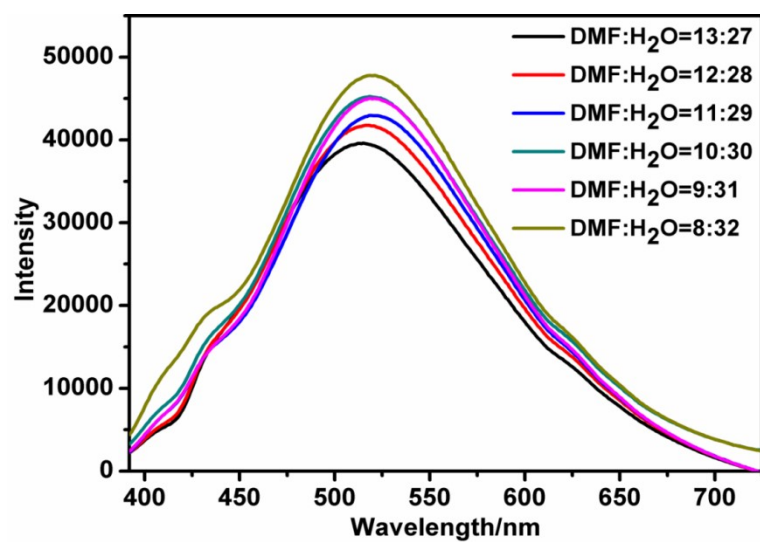

Fig. S4. fluorescent spectra of BDG with different water content  
(0.5%,  $\lambda_{\text{ex}} = 372 \text{ nm}$ )

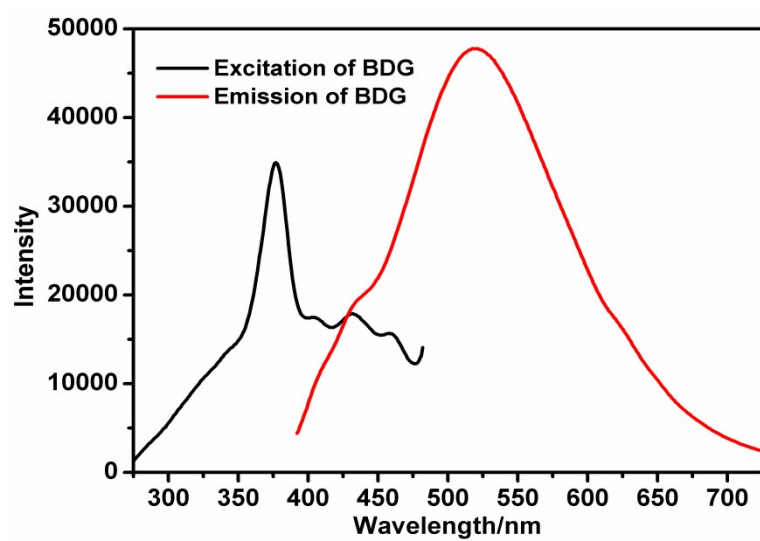

**Fig. S5.** Excitation spectrum and emission spectrum of BDG (0.5%,  $V_{\text{DMF}} : V_{\text{water}} = 1 : 4$ )

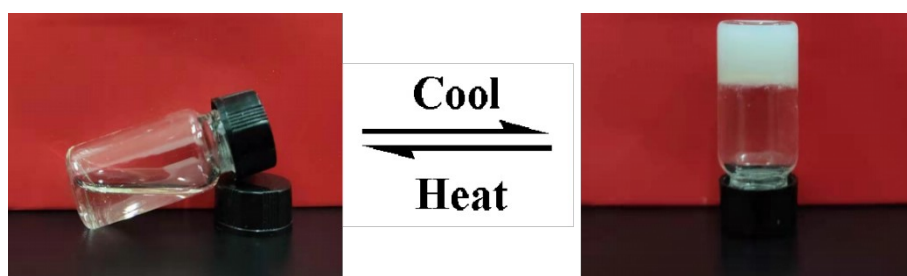

**Fig. S6.** Illustration for reversible gel-sol transformation of the BDG triggered by temperature (0.5%,  $V_{\text{DMSO}} : V_{\text{water}} = 1 : 4$ )



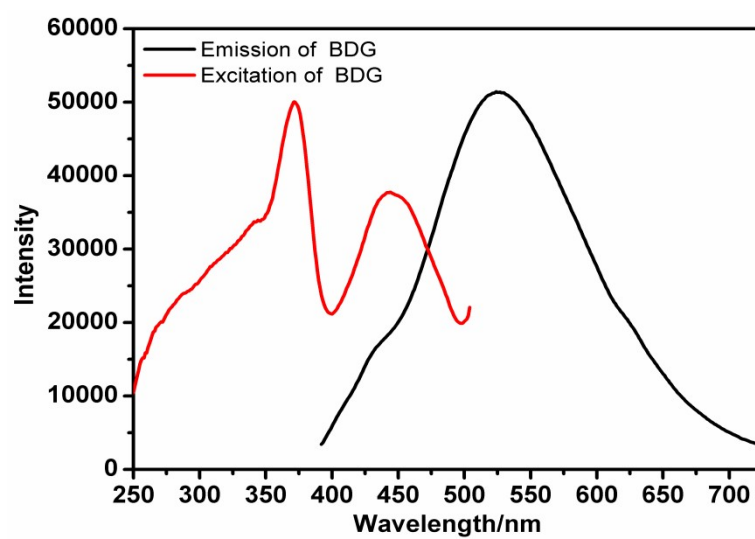

**Fig. S7.** Excitation spectrum and emission spectrum of BDG (0.5%,  $V_{\text{DMSO}} : V_{\text{water}} = 1 : 4$ )

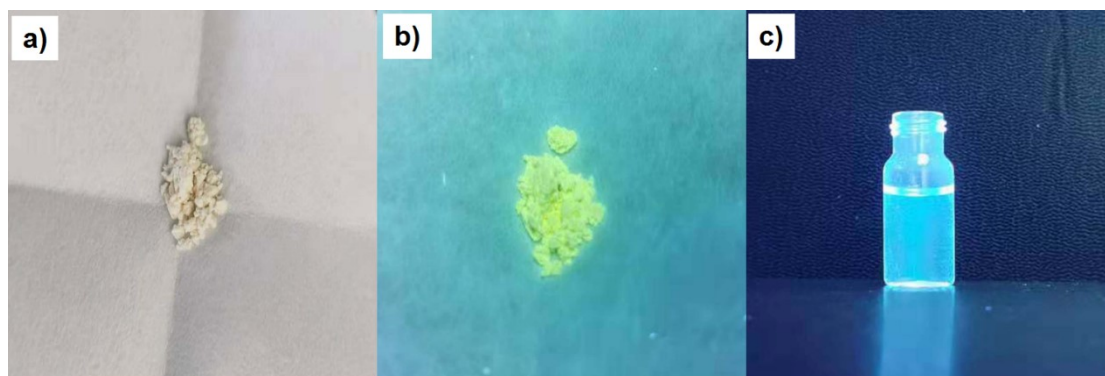

**Fig. S8.** The photos of BD powder (25 °C) were taken under a) daylight and b) UV light, respectively. c) The photo of BD in DMF ( $1 \times 10^{-4}$  M, 25°C) were taken under UV light

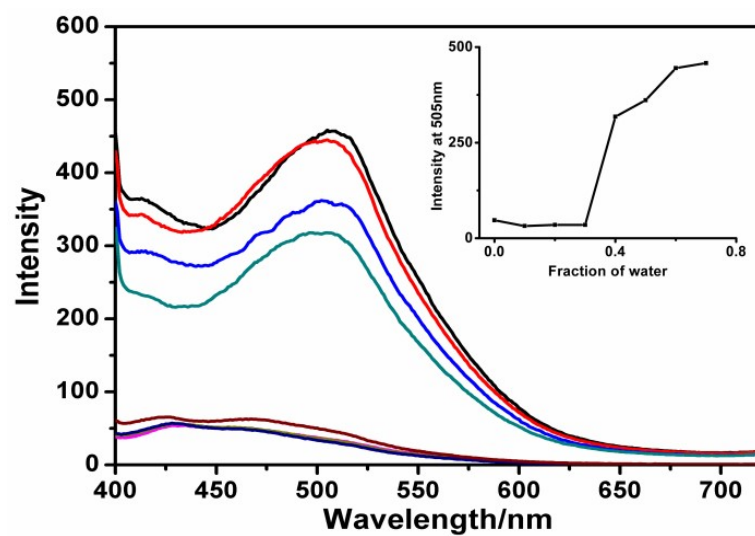

**Fig. S9.** Fluorescence spectra of BD ( $3 \times 10^{-4}$  M) in a DMF/H<sub>2</sub>O mixed solution at different vol % ( $\lambda_{\text{ex}} = 372$  nm). Inset: Fluorescence intensity of BD at 505 nm in the presence of different fraction of water from 0 to 70%

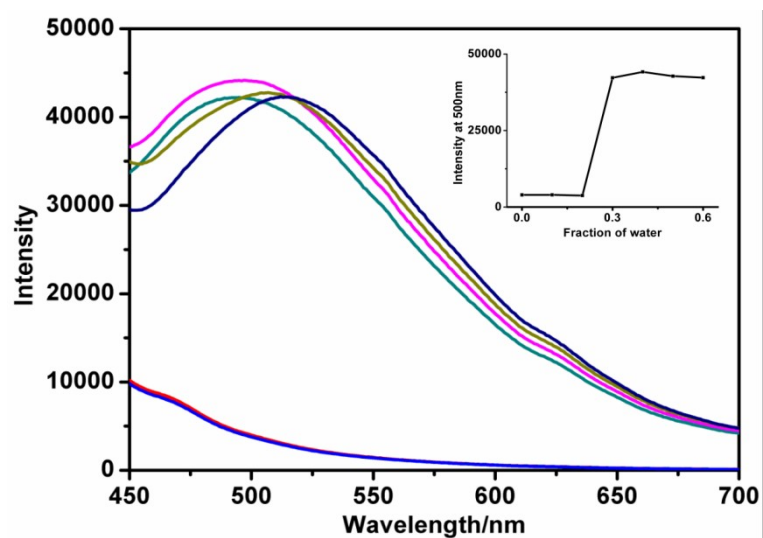

**Fig. S10.** Fluorescence spectra of BD ( $3 \times 10^{-4}$  M) in a DMSO/H<sub>2</sub>O mixed solution at different vol % ( $\lambda_{\text{ex}} = 372$  nm). Inset: Fluorescence intensity of BD at 510 nm in the presence of different fraction of water from 0 to 60%

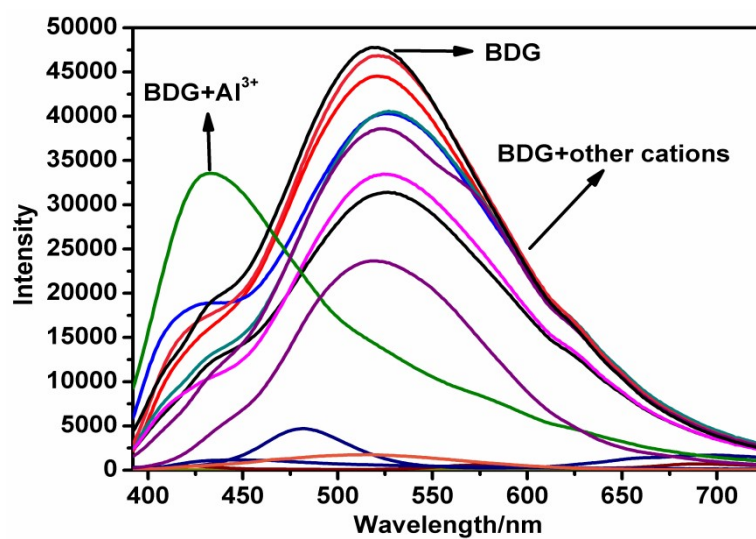

**Fig. S11.** Fluorescence spectra ( $\lambda_{\text{ex}} = 372 \text{ nm}$ ) of BDG (0.5%,  $V_{\text{DMF}} : V_{\text{water}} = 1 : 4$ ) in the presence of various cations (10.0 equiv.). Respectively, using 0.1 M nitrate solution as the sources at room temperature

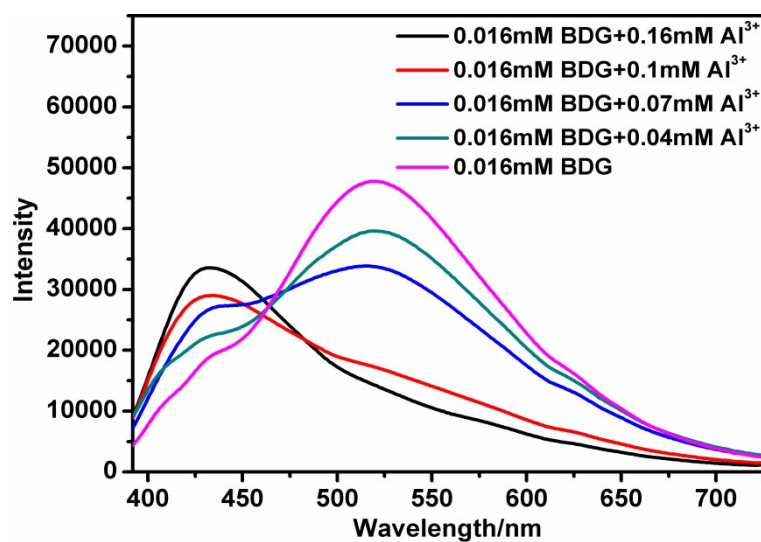

**Fig. S12.** Fluorescent titration spectra ( $\lambda_{\text{ex}} = 372 \text{ nm}$ ) of BDG (7.7 mM) upon addition of  $\text{Al}^{3+}$  in DMF/ $\text{H}_2\text{O}$  ( $V_{\text{DMF}} : V_{\text{water}} = 1 : 4$ )

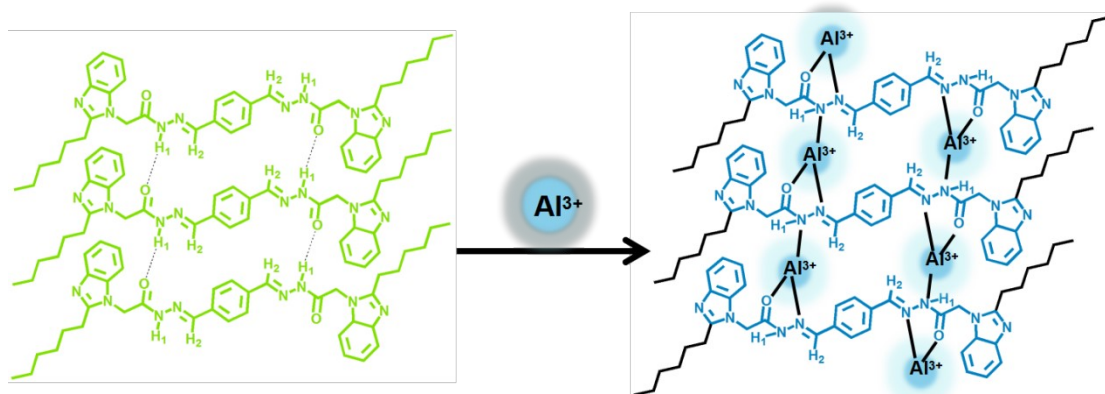

**Fig. S13.** Proposed sensing mechanism of BDG for  $\text{Al}^{3+}$

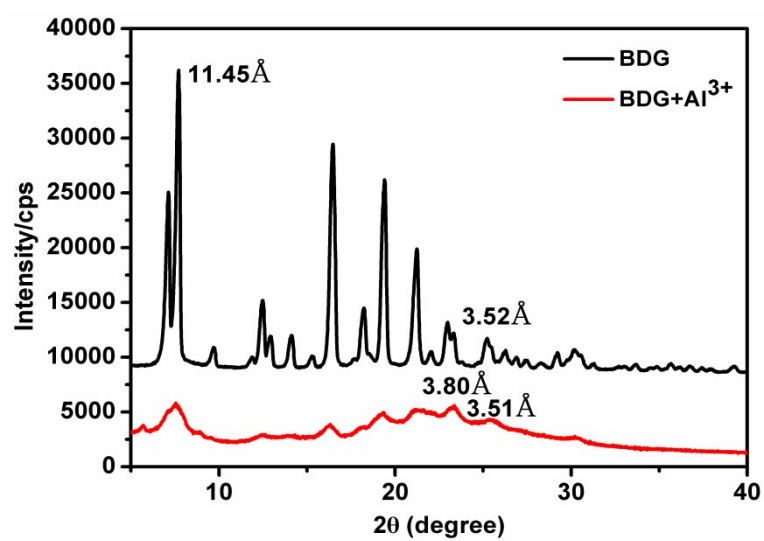

**Fig. S14.** The powder X-ray diffraction pattern of the xerogel BDG and BDG-Al



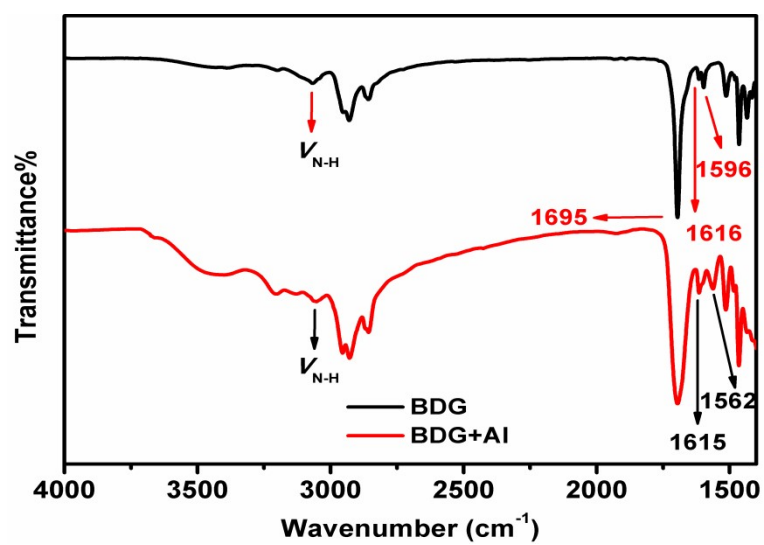

**Fig. S15.** FT-IR spectra of the xerogel BDG and BDG-Al

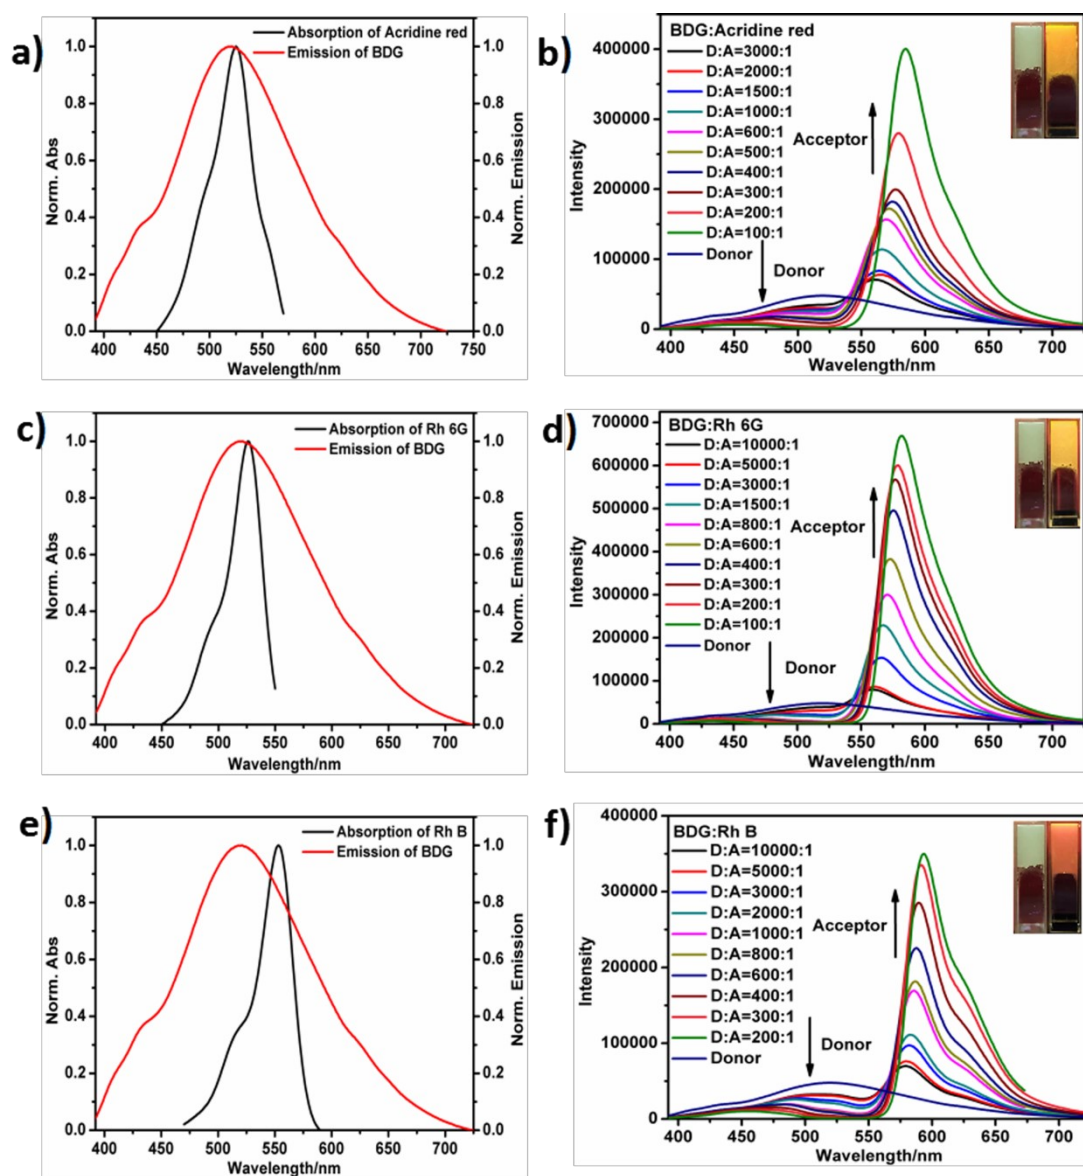

**Fig. S16.** Normalized emission spectrum of BDG (7.7 mM), absorption spectrum of (a) Acridine red ( $1 \times 10^{-5}$  M), (c) Rh B ( $1 \times 10^{-5}$  M) and (e) Rh 6G ( $1 \times 10^{-5}$  M). Fluorescence spectra of BDG (7.7 mM) in gel with different concentrations of (b) Acridine red (77  $\mu$ M,  $\lambda_{\text{ex}} = 372$  nm, Inset: photographs of BDG, BDG/acridine red), (d) Rh 6G (77  $\mu$ M,  $\lambda_{\text{ex}} = 372$  nm, Inset: photographs of BDG, BDG/Rh 6G) and (f) Rh B (38.5  $\mu$ M,  $\lambda_{\text{ex}} = 372$  nm, Inset: photographs of BDG, BDG/Rh B under UV light)

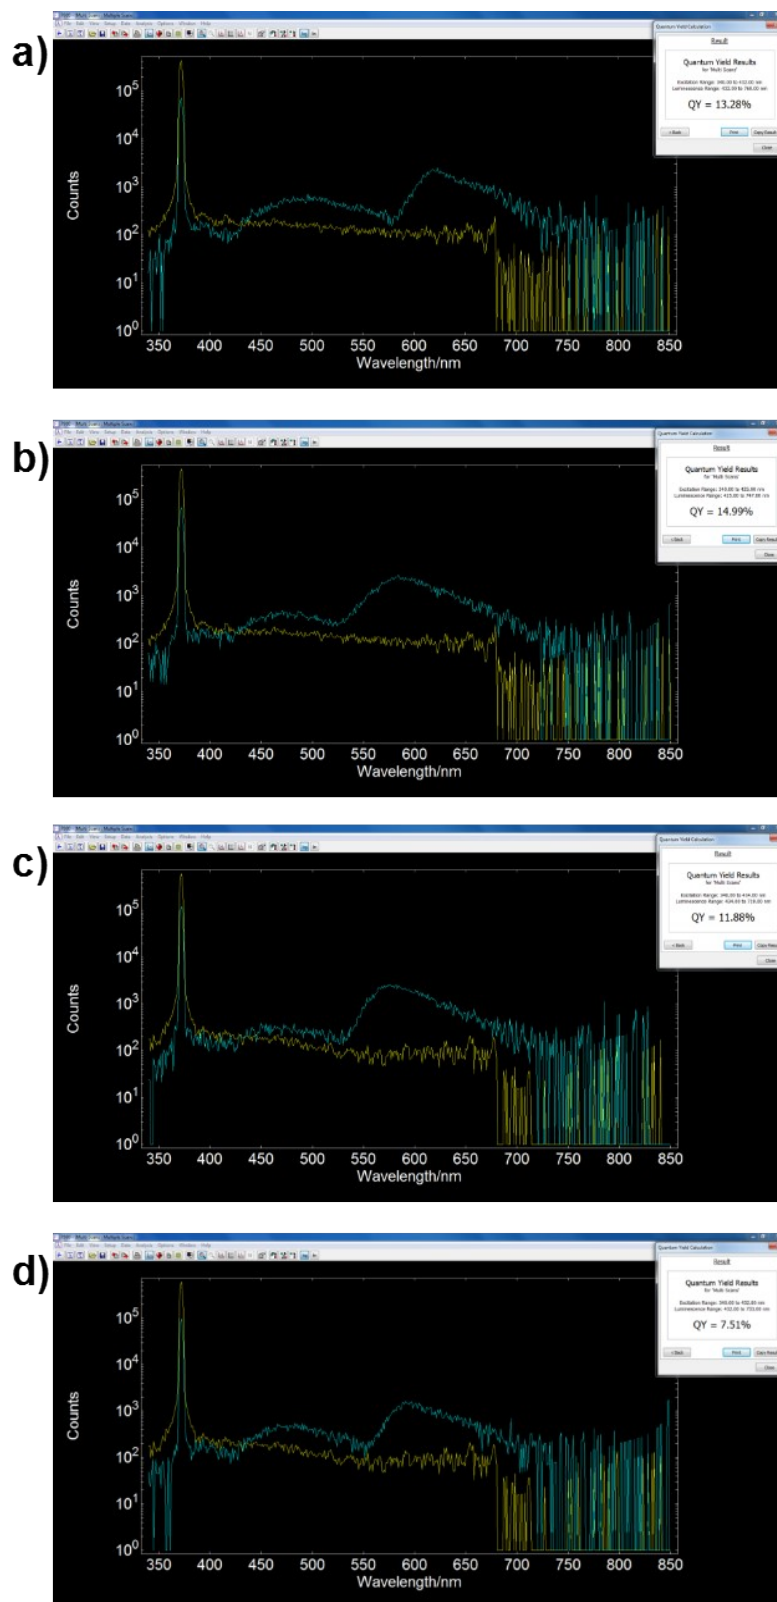

**Fig. S17.** Absolute fluorescence quantum yields ( $\Phi_{f(abs)}$ ) of (a) BDG / SR 101 (7.7 mM / 38.5 mM), (b) BDG / acridine red (7.7 mM / 77  $\mu$ M), (c) BDG / Rh 6G (7.7 mM / 77  $\mu$ M) and (d) BDG / Rh B (7.7 mM / 38.5  $\mu$ M) ( $\lambda_{ex} = 372$  nm) in DMF/H<sub>2</sub>O

Energy-transfer efficiency,  $\Phi_{ET}$ , the fraction of the absorbed energy that is transferred to the acceptor is experimentally measured as a ratio of the fluorescence intensities of the donor in the absence and presence of the acceptor ( $I_D$  and  $I_{DA}$ ).<sup>1</sup>

$$\Phi_{ET} = 1 - I_{DA}/I_D$$

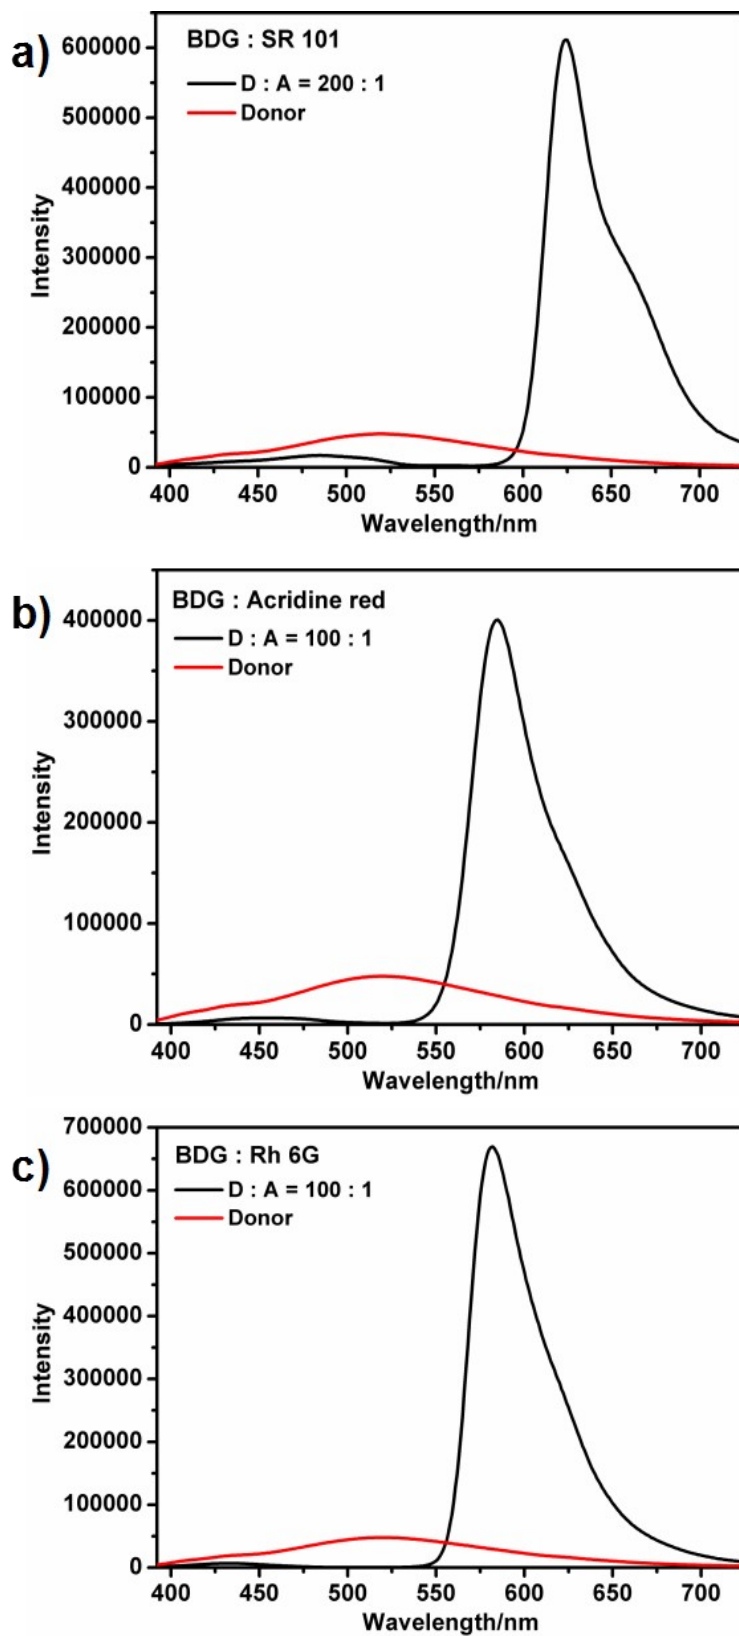

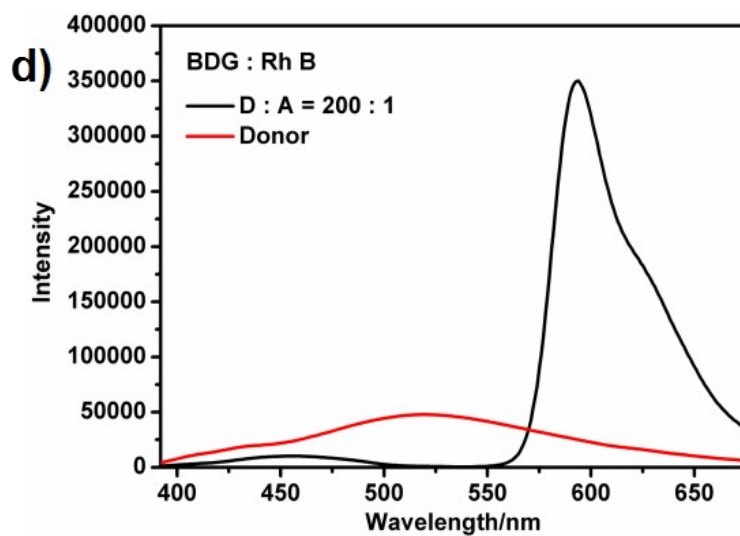

**Fig. S18.** Fluorescence spectra of a) BDG and BDG/SR 101 assembly, b) BDG and BDG/acridine red assembly, c) BDG and BDG/Rh 6G assembly and d) BDG and BDG/Rh B assembly ( $\lambda_{\text{ex}} = 372$  nm, [BDG] = 7.7 mM, [SR 101] = 38.5  $\mu\text{M}$ , [acridine red] = 77  $\mu\text{M}$ , [Rh 6G] = 77  $\mu\text{M}$  and [Rh B] = 38.5  $\mu\text{M}$ )

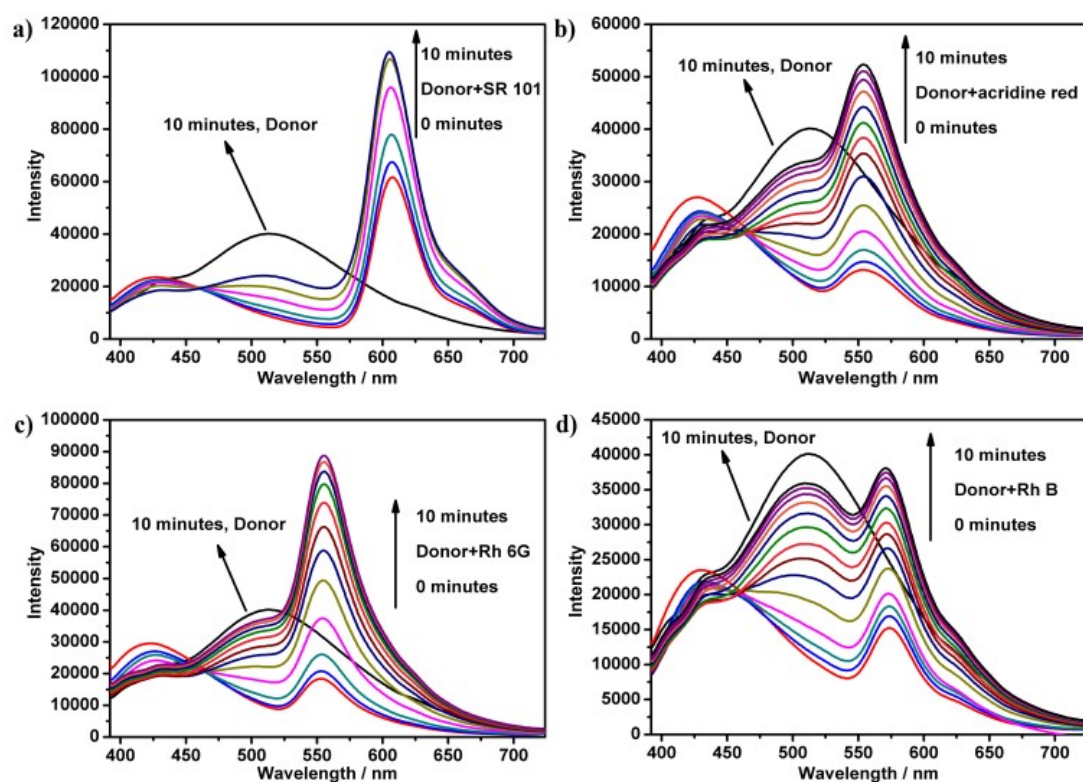

**Fig. S19.** Fluorescence spectra ( $\lambda_{\text{ex}} = 372 \text{ nm}$ ) of a) BDG and BDG/SR 101, b) BDG/acridine red, c) BDG/Rh 6G and d) BDG/Rh B in mixed solutions ( $[\text{BDG}] = 2.5 \text{ mM}$ ,  $[\text{SR 101}] = 0.83 \text{ }\mu\text{M}$ ,  $[\text{acridine red}] = 0.83 \text{ }\mu\text{M}$ ,  $[\text{Rh 6G}] = 0.25 \text{ }\mu\text{M}$  and  $[\text{Rh B}] = 0.25 \text{ }\mu\text{M}$ ,  $V_{\text{DMF}} : V_{\text{water}} = 1 : 4$ )

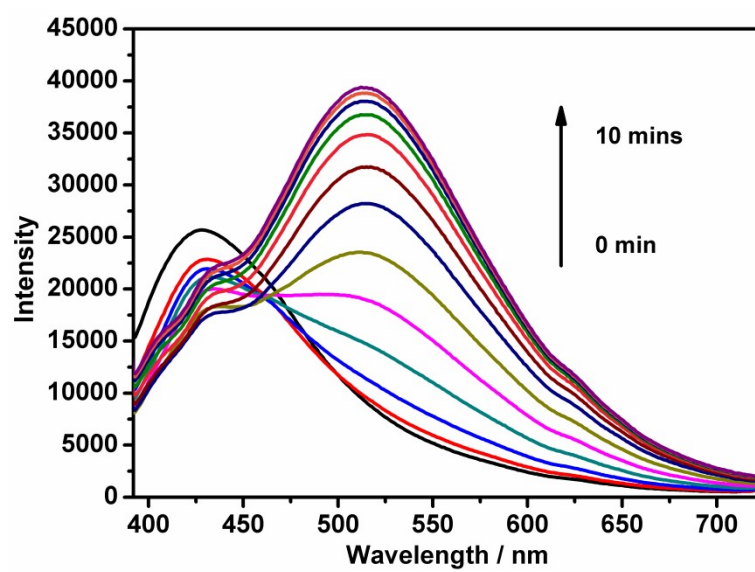

**Fig. S20.** Fluorescence spectra ( $\lambda_{\text{ex}} = 372 \text{ nm}$ ) of BD during the gelation process from 95 °C to 25 °C ([BD] = 2.5 mM,  $V_{\text{DMF}} : V_{\text{water}} = 1 : 4$ )

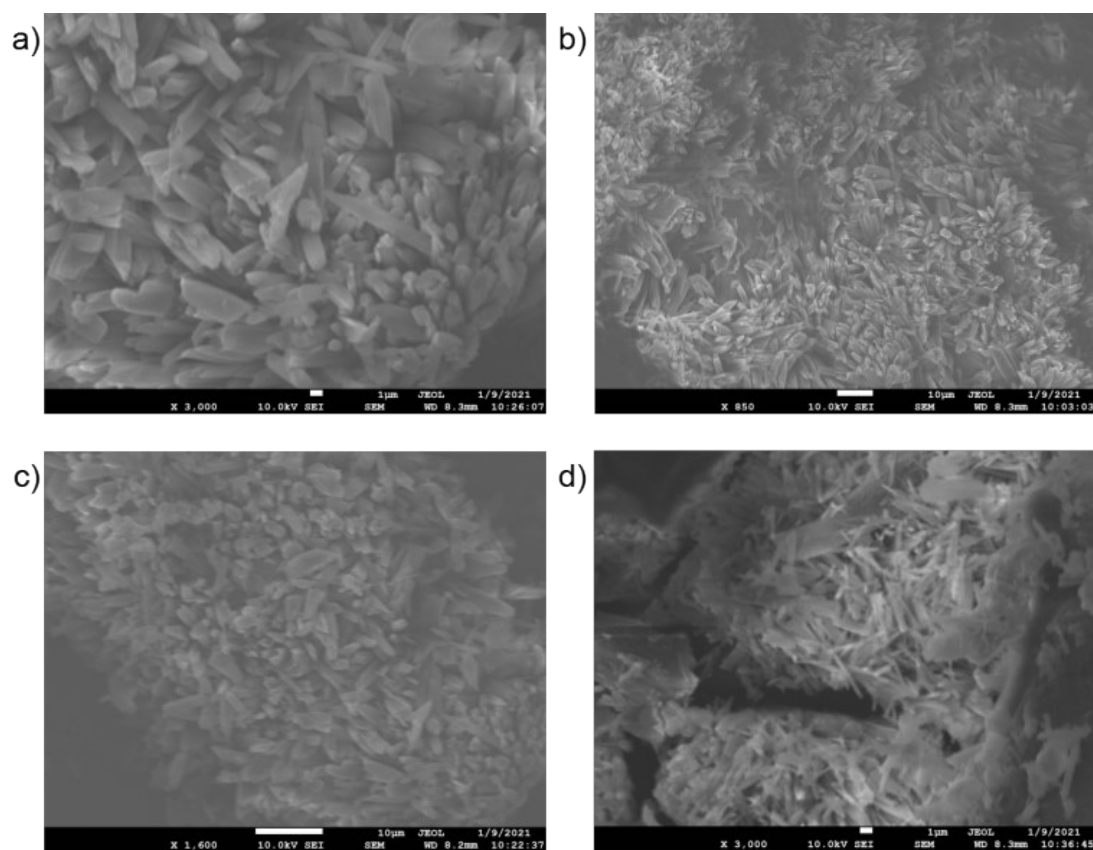

**Fig. S21.** FE-SEM micrographs of the xerogel of a) BDG/SR 101, b) BDG/acridine red, c) BDG/Rh 6G and d) BDG/Rh B. The gel was two days old before the images were taken. ([BDG] = 7.7 mM, [SR 101] = 38.5  $\mu$ M, [acridine red] = 77  $\mu$ M, [Rh 6G] = 77  $\mu$ M and [Rh B] = 38.5  $\mu$ M,  $V_{\text{DMF}} : V_{\text{water}} = 1 : 4$ )



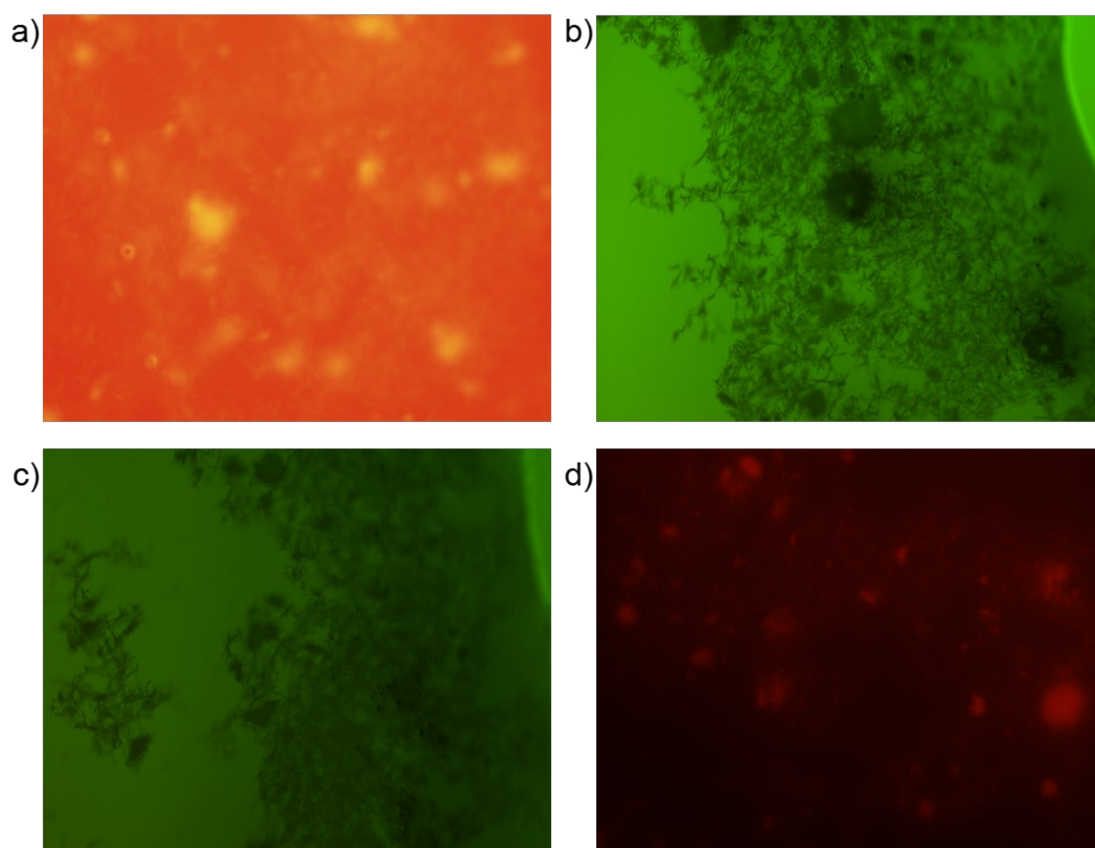

**Fig. S22.** FOM images of a) BDG/SR 101, b) BDG/acridine red, c) BDG/Rh 6G and d) BDG/Rh B. ([BDG] = 7.7 mM, [SR 101] = 38.5  $\mu$ M, [acridine red] = 77  $\mu$ M, [Rh 6G] = 77  $\mu$ M and [Rh B] = 38.5  $\mu$ M,  $V_{\text{DMF}} : V_{\text{water}} = 1 : 4$ )

1. (a) J. J. Li, Y. Chen, J. Yu, N. Cheng and Y. Liu, *Adv. Mater.*, 2017, **29**, 1701905-1701909;  
(b) S. Guo, Y. Song, Y. He, X. Y. Hu and L. Y. Wang, *Angew. Chem. Int. Ed.*, 2018, **57**,  
3163-3167; (c) M. Hao, G. P. Sun, M. Z. Zuo, Z. Q. Xu, Y. Chen, X. Y. Hu and L. Y. Wang,  
*Angew. Chem. Int. Ed.*, 2020, **59**, 10095-10100.
